# Supplementary material
Source: Springer Nature journal article supplement (https://www.springermedizin.de/resource/supplementary/13000_2011_426_MOESM3_ESM.pdf/9624524)

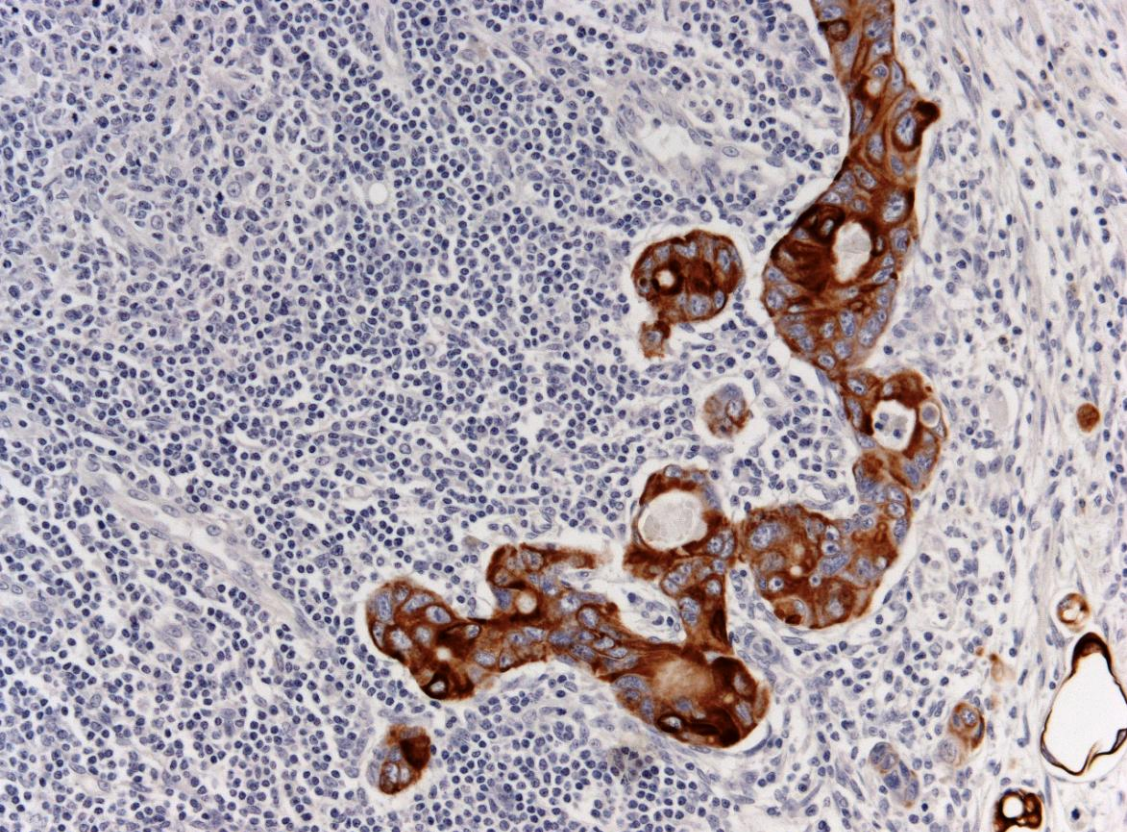

Supplement: MOESM3 [file 9624524]
